# Supplementary material
Source: publisher figshare collection journal article supplement (https://sage.figshare.com/ndownloader/files/17961542)
Supplement: Supplementary file 1 [file 17961542]

**George Wood** is a postdoctoral fellow in the Institute for Policy Research at Northwestern University. His research examines social disparities in public health and criminal justice outcomes, with particular focus on gun violence, police use of force, and policing reform.

**Daria Roithmayr** is the Richard and Antoinette Kirtland Professor of Law at the University of Southern California. She teaches and writes about the evolutionary dynamics of persistent racial inequality. She has been affiliated with Harvard's Program for Evolutionary Dynamics since 2011.

**Andrew Papachristos** is Professor of Sociology and Faculty Fellow at the Institute for Policy Research at Northwestern University. His research applies network science to the study of neighborhood and police violence, neighborhood change, and violence prevention efforts.
